# Supplementary material for: Theoretical study of the reductive decomposition of 1,3-propane sultone: SEI forming additive in lithium-ion batteries
Source: Royal Society of Chemistry journal article supplement (doi:10.1039/c2ra20200j), 2012-01-01
Supplement: c2ra20200j.pdf [file c2ra20200j.pdf]

## Theoretical Study of the Reductive Decomposition of 1,3-Propane Sultone: SEI Forming Additive in Lithium-ion Batteries

Ermias Girma Leggesse and Jyh-Chiang Jiang

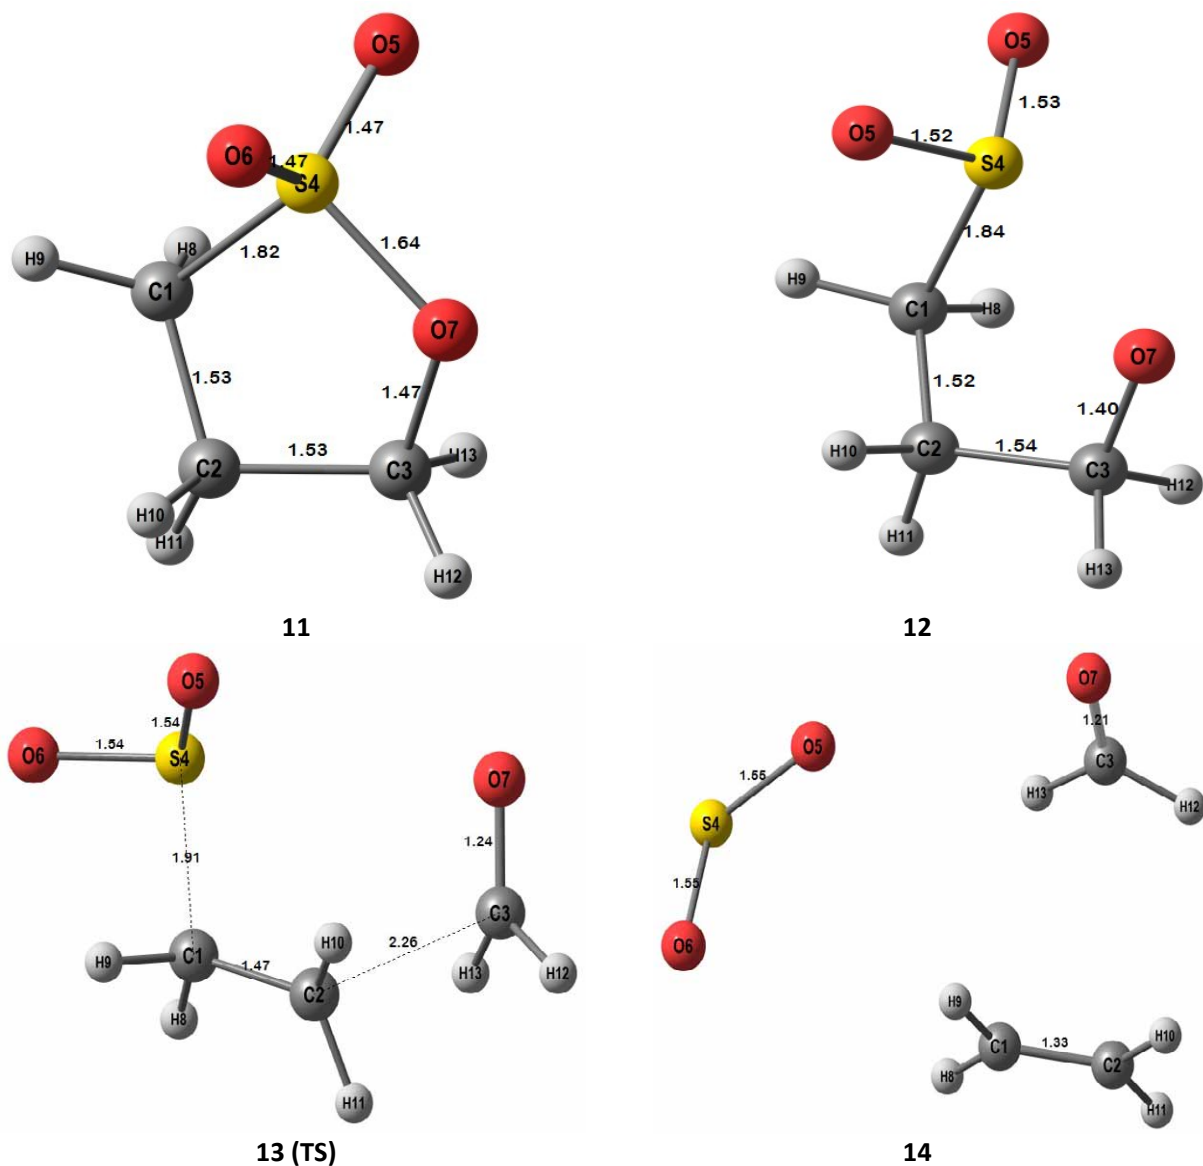

Figure S1. The optimized geometry of the reductive decomposition products of PS (bond length in Å)

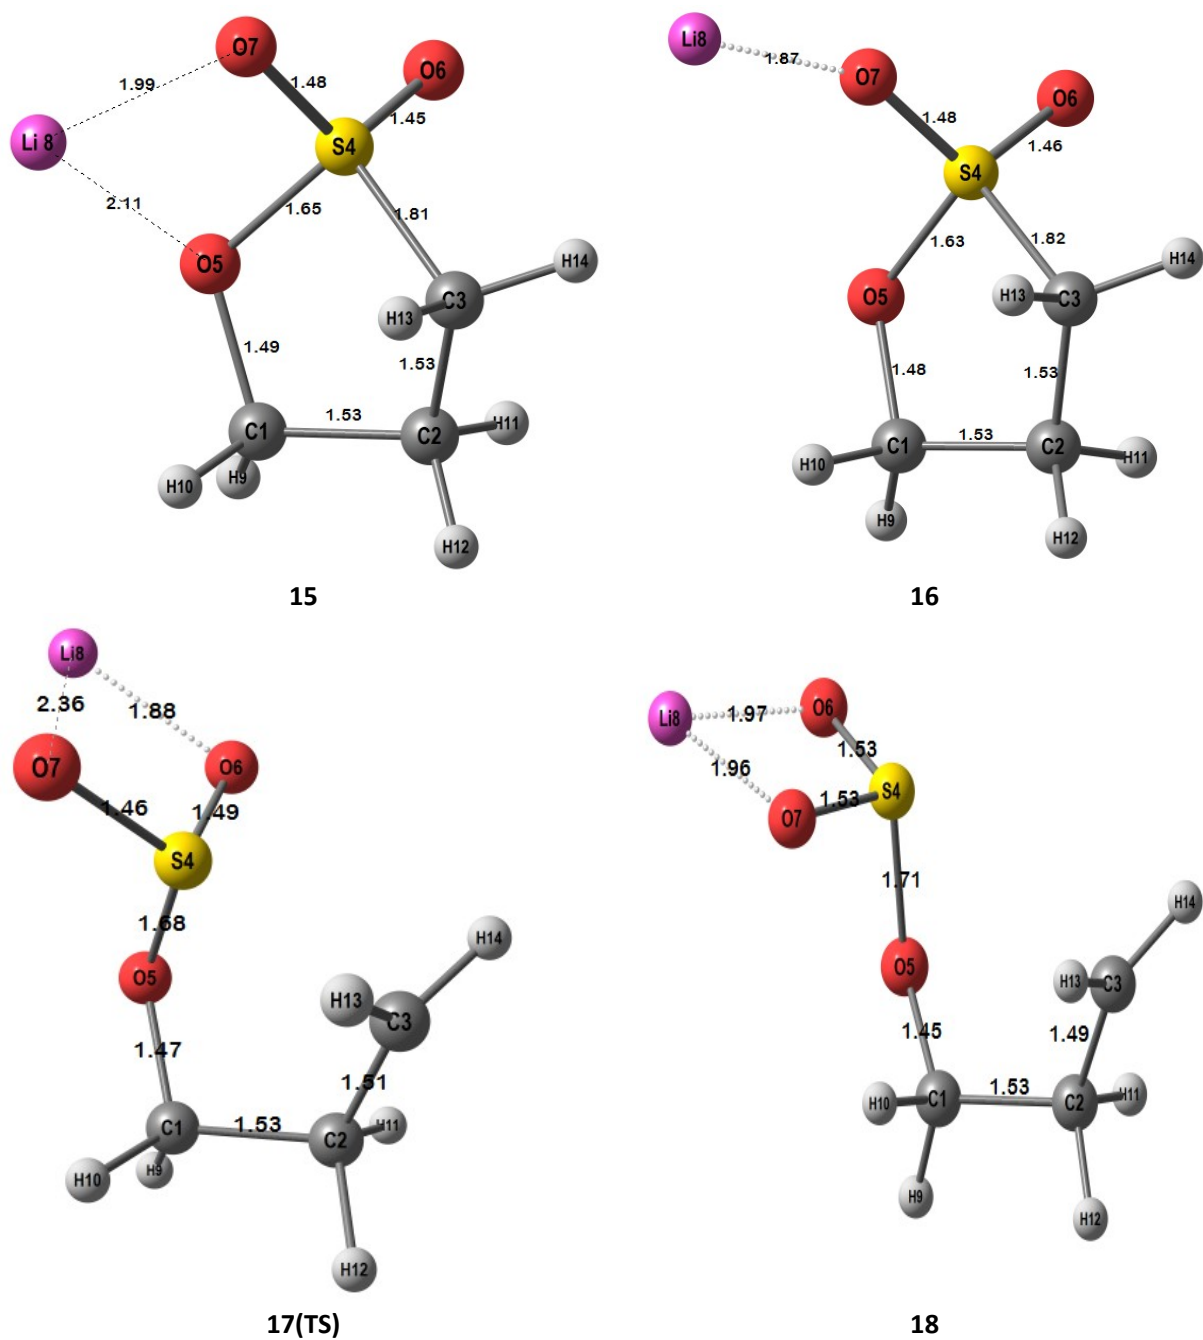

Figure S2. The optimized geometry of the reductive decomposition products of  $\text{Li}^+(\text{PS})$  (bond length in Å)

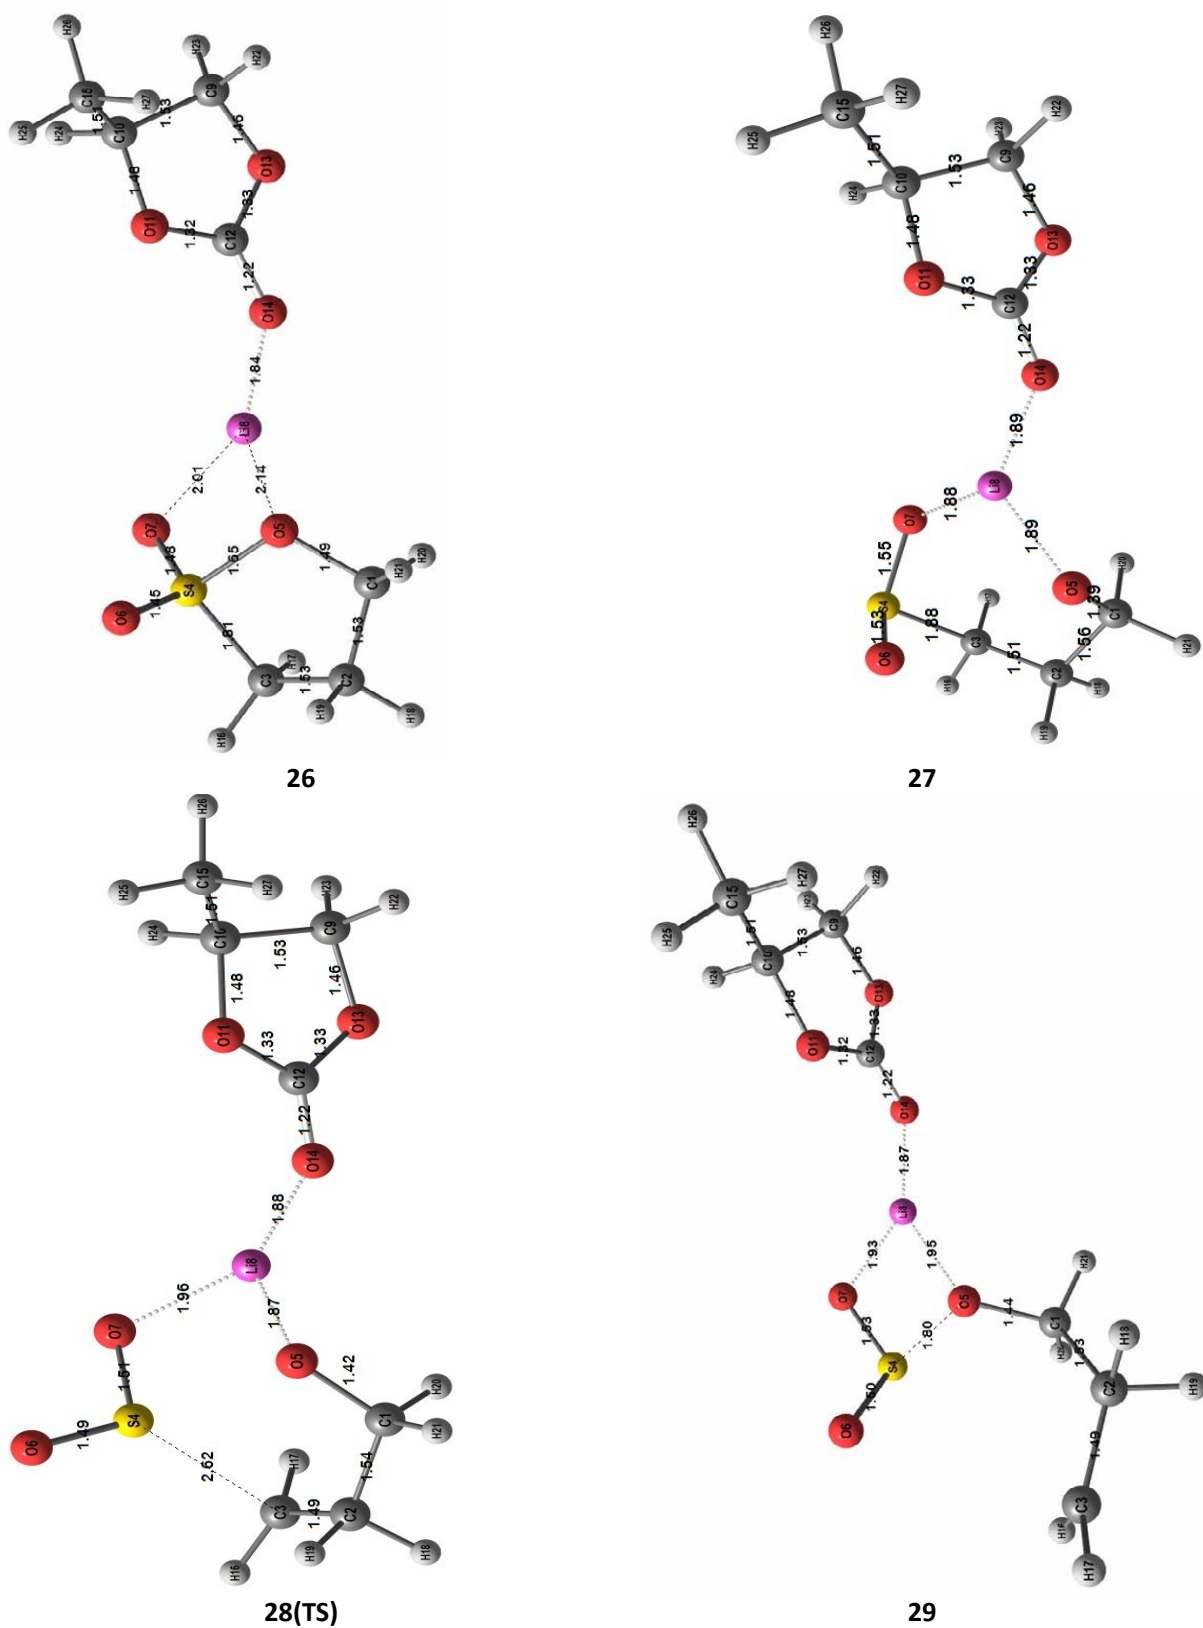

Figure S3. The optimized geometry of the reductive decomposition products of (PC)Li<sup>+</sup>(PS) (bond length in Å)

Table S1. Vibrational (harmonic approximation),  $q_{\text{vib}}$ , electronic ( $q_{\text{ele}}$ ), translational ( $q_{\text{trans}}$ ), Rotational ( $q_{\text{rot}}$ ) and calculated molecular partition functions ( $Q = q_{\text{vib}} \cdot q_{\text{ele}} \cdot q_{\text{trans}} \cdot q_{\text{rot}}$ ) per unit volume.

|         | $q_{\text{vib}}$       | $q_{\text{ele}}$    | $q_{\text{trans}}$  | $q_{\text{rot}}$    | $Q$                    |
|---------|------------------------|---------------------|---------------------|---------------------|------------------------|
| 16      | $0.892 \times 10^{16}$ | $0.200 \times 10^1$ | $0.576 \times 10^8$ | $0.312 \times 10^6$ | $3.209 \times 10^{29}$ |
| 17 (TS) | $0.327 \times 10^{16}$ | $0.200 \times 10^1$ | $0.576 \times 10^8$ | $0.328 \times 10^6$ | $1.231 \times 10^{29}$ |
| 12      | $0.122 \times 10^{16}$ | $0.200 \times 10^1$ | $0.530 \times 10^8$ | $0.281 \times 10^6$ | $3.647 \times 10^{28}$ |
| 13(TS)  | $0.120 \times 10^{17}$ | $0.200 \times 10^1$ | $0.530 \times 10^8$ | $0.364 \times 10^6$ | $4.236 \times 10^{29}$ |
| 27      | $0.111 \times 10^{23}$ | $0.200 \times 10^1$ | $0.138 \times 10^9$ | $0.401 \times 10^7$ | $1.235 \times 10^{37}$ |
| 28(TS)  | $0.237 \times 10^{23}$ | $0.200 \times 10^1$ | $0.138 \times 10^9$ | $0.445 \times 10^7$ | $2.912 \times 10^{37}$ |
